# Supplementary material for: DNA Methylation Variation Is Identified in Monozygotic Twins Discordant for Non-syndromic Cleft Lip and Palate
Source: Front Cell Dev Biol. 2021 May 12;9:656865. doi: 10.3389/fcell.2021.656865 (PMC8149607; doi:10.3389/fcell.2021.656865)
Supplement: Supplementary file 2 [file Table_1.xlsx]

## Sheet: Sheet1
Supplementary Table 1. List of genes linked to NSCLP through human genetics and rodent studies.
MGI (lip/palate phenotype)	genetic candidates	omim+mouse
cdon	pbx1	abcd3
krt5	ren	acan
sox11	hoxa1	actb
jmjd6	ptch1	acvr1
runx2	jag2	akap8
fras1	mmp2	alx1
ift88	maf	alx3
ccp110	nog	ap2b1
zfp950	kiaa1598	apaf1
lrp2	mthfr	arhgap31
satb2	pax7	arid1b
nprl3	abca4	arnt
ift172	arhgap29	asxl1
lrp6	irf6	atr
rax	fam49a	atrx
pnn	tgfa	b3galtl
adgra2	sumo1	b3gat3
tcof1	tp63	b9d1
hoxa3	msx1	bcor
hoxa2	pdgfc	bmp2
phc1	foxe1	bmp4
fzd2	fgf8	bmp7
crebbp	vax1	bmper
jag2	bmp4	bnc2
st14	tgfb3	boc
foxf2	crispld2	braf
pbx1	ntn1	brip1
col2a1	rhpn2	bub1b
hspg2	bcl3	cacna1s
snai2	mafb	cant1
tshz1	gstt1	cask
grb2	myh9	casr
sim2	fgfr3	cdc6
mks1	fgfr1	cdh1
gldc	fktn	cdkn1c
anp32b	pomt1	cdon
foxe1	fgfr2	cfc1
schip1	pvrl1	chd7
pdgfc	pomt2	chrd
gskip	fkrp	chrna1
twist1	tbx1	chrnd
sox2	large	chrng
inpp5e	kal1	chst14
dnrb	zfp36l2	chsy1
sox9	thada	chuk
rpl38	epha3	col11a1
sfn	col8a1	col11a2
sox5	filip1l	col2a1
tp63	fgf10	col9a2
edn1	hla-b	colec11
ncoa6	dcaf4l2	comt
gab1	mmp16	crebbp
ptch1	vps13b	crk
wnt9b	c9orf156	crlf1
kif7	hemgn	ctgf
vegfa	mgmt	ctnnb1
zeb1	spry2	dgcr2
ick	tpm1	dhcr24
pax9	arid3b	dhcr7
sdccag8	crebbp	dhodh
csrnp1	adcy9	dis3l2
gabrb3	pik3r5	dlg1
foxc2	tanc2	dlx1
pak1ip1		dlx2
prdm16		dlx5
meox2		dok7
pcsk5		dxs423e
glg1		dync2h1
ermp1		ednrb
dph1		efnb1
sh3pxd2a		eftud2
qsox1		ephb2
slc32a1		erbb2
ift140		ercc5
wdr19		esco2
gad1		ext1
ap2b1		eya1
vax1		fam123b
dhrs3		fam20c
mn1		fbn1
slmap		fgd1
smoc1		fgf10
pigv		fgf18
cdkn1c		fgf8
ryr1		fgf9
prickle1		fgfr1
gli2		fgfr2
robo1		fgfr3
gli3		fign
recql4		flna
ndst1		flnb
mnt		flvcr2
wrn		foxc2
sufu		foxe1
tctn2		foxf2
sostdc1		foxg1
col11a1		fras1
rspo2		frem2
gdf11		fst
ryk		fto
pdgfra		fuz
tgfb3		fzd1
tgfb2		fzd2
prrx1		g6pc3
osr2		gab1
ctnnbip1		gabrb3
wnt5a		gad1
rpgrip1l		gata6
grhl3		gcmb
hic1		gdf1
kat6a		gdf6
ror2		gja1
dhcr7		gjb2
tfap2a		gli2
oca2		gli3
plxnd1		gpc3
fign		gpr124
rfng		grb2
egfr		gsk3b
efna5		gusb
papss2		h19
loxl3		hand2
lmna		hca1
ctgf		hoxa1
krt6a		hoxa2
efnb2		hpgd
gbx2		hs2st1
nsd2		hvec
efnb1		hyal1
tbx22		hyls1
flna		ick
sc5d		ift172
msx1		ift88
pitx1		il1b
myh10		il1rn
pcnt		image
pitx2		impad1
fst		inhba
arid5b		inhbb
inhba		inpp5e
cask		irf1
smad7		irf6
ckap5		itgav
fgf18		itgb8
dlg1		jag2
fgfr1		jmjd6
lhx8		kal1
fgf10		kat6b
nabp2		kcnj13
ift27		kcnj2
fgfr2		kiaa1289
midn		kif22
pkdcc		kif3a
chrd		kif7
pds5b		klf6
pds5a		kras
hhat		l1cam
fgf9		lhx8
sall3		lmna
tmem107		lmx1b
cacna1s		lrp4
tapt1		luzp1
tiparp		madh3
apaf1		map2k1
kcnj13		map2k2
rad23b		masp1
fuz		mbtps2
bmp7		mcops8
dnm2		med12
acvr2a		megf10
impad1		meox2
esrp1		mid1
irf6		mks1
sp8		mll2
qrich1		mmp14
sos1		mmp16
shox2		mn1
dlx1		mnt
dlx2		msc
gsk3b		msx1
dlx5		msx2
dlx6		mthfr
bnc2		mutyh
chd7		myh3
hs2st1		nbs1
sgpl1		ncoa6
lasp1		ncor2
casp3		neb
otx2		nek1
kdf1		nipbl
tbx2		nkx2-5
tbx1		nkx2-6
skor2		nsd1
eya1		ofc4
cyp51a1		ofd1
chuk		orc1
eya4		osr2
tbx3		otx2
asxl1		pax3
asph		pax8
hand2		pax9
tbx10		pbx1
crk		pcgf2
tll1		pdgfc
nxn		pdgfra
luzp1		pds5a
barx1		pds5b
acan		pex7
adamts6		phc1
ednrb		phc2
zic3		phf8
sumo1		pigl
itgb8		pigv
itgav		pik3ca
kcnj2		pitx1
		pkdcc
		plcb4
		polr1c
		polr1d
		pomt1
		pomt2
		porcn
		pqbp1
		prdm16
		prokr2
		prrx1
		prrx2
		ptch1
		pten
		pth
		ptpn11
		ptprf
		ptprs
		pxmp3
		rad23b
		rai1
		rapsn
		rb1
		rbm10
		recql4
		rfng
		ripk4
		ror2
		rpgrip1l
		rpl11
		rpl5
		rps17
		rps19
		rps7
		rspo2
		runx2
		ryk
		ryr1
		sall4
		satb2
		sc5dl
		scarf2
		sema3e
		sf3b4
		sfn
		shfm3
		shh
		shox2
		sim2
		six3
		skor2
		slc26a2
		slc32a1
		slc35d1
		smoc1
		sms
		snai1
		snai2
		sox11
		sox2
		sox5
		sox9
		specc1l
		spint2
		sptlc1
		sry
		stra6
		sumo1
		tab2
		tbx1
		tbx10
		tbx15
		tbx19
		tbx2
		tbx22
		tbx3
		tbx4
		tbx5
		tcof1
		tctn2
		tfap2a
		tgfß1
		tgfß2
		tgfß3
		tgfßr1
		tgfßr2
		tmco1
		tmem216
		tmem67
		tp63
		trim37
		trps2
		tshz1
		twist1
		ubb
		vcan
		wdr19
		wdr65
		wnt3
		wnt5a
		wnt7a
		wt1
		zeb1
		zeb2
		zic2
		zic3
		zmpste24
