# Supplementary material for: DNA Methylation Variation Is Identified in Monozygotic Twins Discordant for Non-syndromic Cleft Lip and Palate
Source: Front Cell Dev Biol. 2021 May 12;9:656865. doi: 10.3389/fcell.2021.656865 (PMC8149607; doi:10.3389/fcell.2021.656865)
Supplement: Supplementary file 3 [file Table_2.xlsx]

## Sheet: DMR
MZ1										MZ2										MZ3										MZ6										MZ7
Chr	start	end	length	nCG	diff.Methy	Gene 1	Distance	Gene 2	Distance	Chr	start	end	length	nCG	diff.Methy	Gene 1	Distance	Gene 2	Distance	Chr	start	end	length	nCG	diff.Methy	Gene 1	Distance	Gene 2	Distance	Chr	start	end	length	nCG	diff.Methy	Gene 1	Distance	Gene 2	Distance	Chr	start	end	length	nCG	diff.Methy	Gene 1	Distance	Gene 2	Distance
chr1	2976318	2979103	2786	10	0.504653	PRDM16	-8064	ACTRT2	39665	chr1	29312818	29312893	76	4	-0.610351	EPB41	99253	TMEM200B	136157	chr1	11178496	11178611	116	8	-0.542812	ANGPTL7	-70844	EXOSC10	-18616	chr1	8118275	8118362	88	4	0.548334	SLC45A1	-259567	ERRFI1	-31951	chr1	45781951	45782030	80	4	0.587169	ZSWIM5	-109763	HPDL	-10554
chr1	5961138	5961504	367	7	0.612906	NPHP4	91210			chr1	49397337	49397433	97	4	0.576498	BEND5	-154795			chr1	45280056	45280131	76	8	-0.58962	TCTEX1D4	-7137	PTCH2	28641	chr1	19890344	19890395	52	5	0.572826	CAPZB	-78391	MINOS1-NBL1	-33103	chr1	147551799	147551882	84	4	0.699284	NBPF24	47708	GPR89B	151335
chr1	6642291	6642407	117	4	-0.67206	ZBTB48	2241	KLHL21	20580	chr1	81983796	81983865	70	5	0.555304	LPHN2	-282251			chr1	59404130	59404336	207	4	-0.550576	FGGY	-358420	JUN	-154448	chr1	21723725	21724692	968	7	-0.508455	ECE1	-107227	NBPF3	-42422	chr1	154908464	154908782	319	8	-0.647336	PMVK	844
chr1	8133671	8134380	710	6	0.540931	SLC45A1	-243860	ERRFI1	-47658	chr1	87668656	87668725	70	5	-0.625608	LMO4	-125460	HS2ST1	288334	chr1	68054197	68054319	123	4	-0.551217	SERBP1	-158189	GADD45A	-96486	chr1	98336362	98336472	111	4	0.500133	DPYD	50162			chr1	176865686	176865868	183	5	-0.507549	ASTN1	268049	PAPPA2	433470
chr1	9815954	9816050	97	4	0.605007	CLSTN1	68582	PIK3CD	104199	chr1	164904923	164904978	56	4	-0.538404	PBX1	376079	LMX1A	421001	chr1	116985516	116985661	146	5	0.577247	ATP1A1	69100	CD58	128072	chr1	156095505	156095608	104	5	0.629662	SEMA4A	-27761	LMNA	11059	chr1	184580040	184580432	393	6	0.585337	EDEM3	143811	C1orf21	224044
chr1	11238109	11238546	438	4	0.688993	EXOSC10	-78390	ANGPTL7	-11070	chr1	184442581	184442676	96	4	0.50466	C1orf21	86437	EDEM3	281418	chr1	161596740	161596803	64	4	-0.556893	FCGR3A	-76954	FCGR3B	4224	chr1	177002495	177003062	568	4	-0.681027	ASTN1	131047	PAPPA2	570472	chr1	230676176	230676615	440	6	-0.508284	PGBD5	-163005	COG2	-101842
chr1	16163754	16163806	53	8	-0.753123	SPEN	-10579	FBLIM1	72786	chr1	207226915	207227058	144	5	0.525625	YOD1	-2565	PFKFB2	382	chr1	226862963	226863068	106	4	-0.696629	ITPKB	63848	C1orf95	126515	chr1	215233504	215233561	58	4	0.528565	KCNK2	-23046	CENPF	456995	chr11	93715197	93715881	685	4	0.533093	VSTM5	-131842	HEPHL1	-38988
chr1	25493801	25494490	690	6	0.583737	RUNX3	-202645	SYF2	64838	chr1	244475112	244475177	66	4	-0.541527	ADSS	140291	ZBTB18	260560	chr1	245215197	245215264	68	4	-0.519766	KIF26B	-103056	EFCAB2	82060	chr1	229976850	229976906	57	4	0.528955	GALNT2	-226078	URB2	214897	chr12	75976833	75977154	322	4	-0.517228	KRR1	-71593	PHLDA1	450718
chr1	27602057	27602561	505	5	-0.505333	TMEM222	-46342	WDTC1	41150	chr11	39940125	39940642	518	4	-0.504952	LRRC4C	375280			chr1	245217861	245217942	82	4	-0.618716	KIF26B	-100385	EFCAB2	84731	chr10	34216404	34216487	84	4	0.596929	NRP1	-591256	PARD3	887803	chr13	22473353	22473447	95	5	0.510997	FGF9	227878
chr1	32354972	32355084	113	5	-0.661021	SPOCD1	-73376	PTP4A2	48960	chr11	72847791	72847933	143	5	0.614623	FCHSD2	5444	ATG16L2	322509	chr10	79146738	79146838	101	4	-0.618299	KCNMA1	250612			chr10	112162115	112162172	58	4	0.561582	SMNDC1	-97435	DUSP5	-95452	chr13	33810212	33810549	338	4	-0.522329	STARD13	49511	KL	219810
chr1	33163549	33164221	673	4	0.640607	SYNC	4835	RBBP4	47136	chr11	87345911	87345978	68	4	0.545438	RAB38	562690	TMEM135	596896	chr10	90939253	90939306	54	4	0.532782	ACTA2	-188133	CH25H	27791	chr10	113057618	113057746	129	4	-0.569949	ADRA2A	220892	GPAM	885839	chr13	42115851	42116031	181	5	0.503384	RGCC	84246	VWA8	419279
chr1	37621316	37621412	97	4	0.520093	ZC3H12A	-318789	GRIK3	-121638	chr11	122558914	122559041	128	4	0.54468	CRTAM	-150230	UBASH3B	32595	chr11	2308443	2308511	69	4	-0.718078	ASCL2	-16295	C11orf21	14666	chr11	9836800	9836873	74	4	-0.592787	SWAP70	151213	SBF2	478917	chr13	112253801	112253884	84	4	-0.525034	SOX1	-468070	TEX29	280828
chr1	39734197	39734289	93	5	0.529308	BMP8A	-223075	MACF1	185209	chr11	132382203	132382299	97	4	0.517098	OPCML	431315	NTM	600895	chr11	44359724	44359809	86	6	0.650947	CD82	-227374	ALX4	-28051	chr11	61143440	61143549	110	4	0.557409	TMEM216	-15664	CYB561A3	-13740	chr14	33777097	33777189	93	4	0.525449	NPAS3	368620	EGLN3	643144
chr1	41861410	41861677	268	5	0.532189	FOXO6	33950	EDN2	88798	chr12	4141672	4141751	80	5	0.751636	CCND2	-241226	PARP11	-159172	chr11	57351496	57351546	51	4	-0.691626	UBE2L6	-16241	SERPING1	-13470	chr11	123349851	123349904	54	4	0.514504	CLMP	-283889	GRAMD1B	-46652	chr14	95704420	95704735	316	5	-0.500772	DICER1	-80231	CLMN	81665
chr1	51442278	51442538	261	4	-0.730236	C1orf185	-125498	CDKN2C	15991	chr12	62868228	62868304	77	5	0.564988	MON2	7669	PPM1H	460551	chr12	32638520	32638840	321	5	-0.603647	FGD4	-16414	BICD1	378517	chr11	128495325	128495458	134	4	-0.579023	FLI1	-68273	ETS1	-37939	chr15	93177229	93177284	56	4	0.683942	FAM174B	21931	ST8SIA2	240199
chr1	55359014	55359153	140	5	-0.51355	TMEM61	-87381	DHCR24	-6193	chr12	64216292	64216411	120	6	-0.597542	SRGAP1	-21721	TMEM5	42769	chr12	47666779	47667443	665	4	0.547347	AMIGO2	-193463	RPAP3	432733	chr12	3948535	3948614	80	9	-0.502648	EFCAB4B	-86307	PARP11	33965	chr15	94346066	94346356	291	4	0.654435	RGMA	-729119	MCTP2	-495284
chr1	63846008	63846260	253	4	-0.578401	ALG6	12873	ITGB3BP	142731	chr13	26647681	26647737	57	5	-0.527698	SHISA2	-22540	RNF6	149082	chr12	69069932	69070032	101	5	0.59924	NUP107	-10532	RAP1B	65363	chr12	6217075	6217197	123	5	0.50976	ANO2	-161738	VWF	16705	chr15	101855403	101855998	596	4	0.513125	SNRPA1	-20245	PCSK6	174172
chr1	66581791	66582408	618	4	0.561904	SGIP1	-417865	PDE4B	323903	chr13	67568561	67568650	90	4	0.590435	PCDH9	235862			chr12	82186273	82186345	73	4	0.501474	METTL25	-565967	PPFIA2	-33200	chr12	122028007	122028068	62	5	-0.524871	ORAI1	-36417	KDM2B	-9149	chr16	2138433	2138500	68	4	-0.590371	NTHL1	-40600	PKD1	47432
chr1	68101396	68101461	66	4	-0.581059	SERBP1	-205360	GADD45A	-49315	chr13	109014231	109014353	123	4	0.530017	MYO16	-234208	TNFSF13B	92226	chr12	109275094	109275156	63	4	0.604259	DAO	1319	SVOP	97314	chr12	132135702	132135821	120	4	-0.530101	SFSWAP	-59920	GPR133	697310	chr16	4395037	4395162	126	7	0.527302	PAM16	6273	GLIS2	30338
chr1	85725719	85726131	413	6	0.505262	C1orf52	-600			chr13	112286497	112287115	619	4	0.570954	SOX1	-435107	TEX29	313791	chr13	20961329	20961388	60	4	0.507383	GJB6	-154825	CRYL1	138637	chr13	24864902	24865430	529	6	-0.623558	C1QTNF9	-16138	SPATA13	311222	chr16	48469571	48469689	119	4	-0.516639	SIAH1	-69818	N4BP1	174490
chr1	90664262	90664661	400	7	0.579381	ZNF326	203788	BARHL2	518332	chr14	29568885	29569597	713	4	-0.564197	FOXG1	334191	PRKD1	827707	chr13	114539974	114540035	62	5	0.50309	GAS6	27035	TMEM255B	77789	chr13	28997194	28997254	61	4	0.573217	FLT1	72008	PAN3	284581	chr16	88257695	88257754	60	4	-0.58305	ZNF469	-236154	BANP	254101
chr1	92349604	92349862	259	5	0.512407	TGFBR3	2054	CDC7	383068	chr14	52394905	52394970	66	4	-0.552946	C14orf166	-61255	GNG2	67806	chr14	91999758	92001118	1361	4	0.535542	SMEK1	-23950	CATSPERB	197992	chr13	56747914	56748087	174	5	-0.624284	PRR20C	-980194			chr17	17082544	17082631	88	4	-0.659698	PLD6	27041	MPRIP	136514
chr1	93425751	93425803	53	5	0.500066	FAM69A	1280	RPL5	128195	chr14	75093885	75094028	144	4	0.554792	LTBP2	-14923	AREL1	85861	chr14	104297304	104297374	71	6	0.500633	PPP1R13B	16588	ZFYVE21	115272	chr13	113928094	113928223	130	5	-0.69318	LAMP1	-23397	CUL4A	64301	chr17	56634655	56634821	167	8	0.516842	2020-09-04	-16559	TEX14	134646
chr1	95112409	95114416	2008	5	0.596783	SLC44A3	-172493	F3	-106057	chr16	89666964	89667036	73	6	-0.584769	DPEP1	-20000	CPNE7	24824	chr15	41104483	41104658	176	7	0.78419	DNAJC17	-4896			chr14	71721206	71721284	79	9	-0.556571	SIPA1L1	-274797	PCNX	347123	chr17	76586947	76588657	1711	4	0.547681	DNAH17	-14326	CYTH1	190574
chr1	95515681	95516139	459	6	-0.567528	CNN3	-123076	ALG14	22591	chr17	4311108	4311165	58	4	-0.521466	UBE2G1	-41360	SPNS3	-25846	chr15	59469182	59469359	178	4	-0.616017	LDHAL6B	-29771	CCNB2	71994	chr14	86314630	86314732	103	4	0.54408	FLRT2	318193			chr18	3618237	3618340	104	4	0.525649	TGIF1	166614	DLGAP1	837046
chr1	116654416	116654532	117	6	0.56188	MAB21L3	98			chr17	7874144	7874203	60	5	-0.538874	GUCY2D	-31738	CNTROB	38701	chr15	67051386	67051445	60	5	0.531881	SMAD3	-306767	SMAD6	56850	chr14	104572038	104572102	65	4	-0.528327	KIF26A	-32990	ASPG	20054	chr2	74219472	74219544	73	4	0.544299	TET3	-53942	DGUOK	65555
chr1	116711540	116712099	560	6	-0.507946	ATP1A1	-204669	MAB21L3	57444	chr17	14358178	14358230	53	4	0.749925	HS3ST3B1	153804	PMP22	807702	chr15	99562971	99563030	60	4	0.564221	SYNM	-82285	PGPEP1L	-14210	chr15	28338841	28338898	58	5	0.502106	OCA2	5634			chr2	158607860	158608019	160	6	0.553505	ACVR1C	-122423	ACVR1	123683
chr1	152973462	152973721	260	4	0.56764	SPRR3	-631			chr17	57860285	57860352	68	7	-0.51564	VMP1	75493	TUBD1	109977	chr16	4000600	4000652	53	4	0.543943	CREBBP	-69899	ADCY9	165560	chr15	35320378	35320434	57	6	0.537862	ZNF770	-39918	DPH6	517963	chr2	179698843	179699099	257	5	-0.579605	TTN	-26821	CCDC141	215815
chr1	161180912	161181091	180	5	0.51727	FCER1G	-4085			chr18	2861707	2862646	940	4	-0.523988	EMILIN2	15149	LPIN2	149768	chr16	19749050	19749116	67	5	-0.523358	KNOP1	-19527	GPRC5B	147156	chr15	66064348	66064444	97	7	-0.554566	DENND4A	20066	SLC24A1	150126	chr2	227850270	227850372	103	5	0.503649	RHBDD1	149650	COL4A4	178508
chr1	166459069	166459371	303	4	-0.593209	POGK	-350106	UCK2	662452	chr19	5738511	5738663	153	5	-0.502208	CATSPERD	17899	ENSG00000267157	47043	chr16	49615341	49615821	481	5	-0.555181	C16orf78	207847	ZNF423	241069	chr15	77353729	77353932	204	4	0.577323	TSPAN3	9739	PSTPIP1	66405	chr2	228231615	228232079	465	4	-0.572	TM4SF20	12175	MFF	41892
chr1	179653753	179656484	2732	5	-0.540208	FAM163A	-57179	TDRD5	94094	chr19	33849506	33849590	85	4	-0.539816	CEBPA	-56078	CEBPG	-14688	chr16	85033868	85033924	57	4	0.729893	ZDHHC7	11212	CRISPLD2	180306	chr15	91529724	91529776	53	4	0.701455	PRC1	7975	RCCD1	31650	chr20	34150057	34151887	1831	4	0.502472	SPAG4	-52842	ERGIC3	21185
chr1	205715141	205716365	1225	8	0.57496	SLC45A3	-66166	NUCKS1	3651	chr19	38803473	38804151	679	5	0.756943	YIF1B	2791	C19orf33	9011	chr17	1664329	1664421	93	4	0.55938	SERPINF1	-878			chr15	99846375	99846517	143	5	0.541625	MEF2A	-259459	LRRC28	54879	chr20	62571651	62572838	1188	4	0.645946	UCKL1	15523	DNAJC5	45710
chr1	206857595	206857809	215	4	0.520695	MAPKAPK2	-680			chr2	131852087	131852175	89	6	-0.554695	FAM168B	-1130			chr17	2728129	2728219	91	4	-0.611335	RAP1GAP2	28442	OR1D5	238727	chr16	3089534	3089647	114	4	0.675747	CCDC64B	-2664			chr21	39236612	39237661	1050	4	0.577368	KCNJ6	51612	DYRK1A	444535
chr1	209528547	209531104	2558	4	0.544319	CAMK1G	-227236			chr2	218087410	218087533	124	5	0.527839	TNP1	-362685	TNS1	721379	chr17	20656767	20656898	132	4	0.506809	CDRT15L2	173796	USP22	289519	chr16	4467361	4467621	261	4	0.609826	CORO7	-826			chr21	43048389	43048568	180	6	0.504371	TMPRSS2	-168487	RIPK4	138787
chr1	214310028	214313029	3002	4	0.547781	SMYD2	-143047	PROX1	150243	chr2	223481094	223481197	104	7	-0.506031	FARSB	39910	SGPP2	191910	chr17	44918054	44919802	1749	4	-0.526704	WNT3	-22802	WNT9B	-10024	chr16	15083564	15083666	103	9	0.538925	PDXDC1	14655	MZ6	66306	chr22	30031609	30031752	144	4	0.533747	CABP7	-84392	NF2	32134
chr1	218388672	218388732	61	4	-0.50363	RRP15	-69927	SPATA17	584036	chr21	19274639	19274704	66	7	-0.542379	CHODL	-342478	C21orf91	-82969	chr17	48520295	48520396	102	6	0.519578	ACSF2	16827	CHAD	25981	chr16	46934849	46934901	53	4	0.677603	GPT2	16585	DNAJA2	72824	chr22	50225735	50225791	57	5	0.530295	ZBED4	-21727	BRD1	-7311
chr1	229518054	229518136	83	4	0.615136	CCSAP	-39360	ACTA1	51746	chr21	43350607	43350681	75	4	-0.522507	PRDM15	-51053	C2CD2	23355	chr17	48945640	48949179	3540	4	-0.586797	TOB1	-3704			chr16	50457543	50457629	87	7	0.52744	NKD1	-124655	BRD7	-54896	chr3	44148210	44148284	75	4	0.544335	TOPAZ1	-135131	ABHD5	415885
chr1	230428593	230428756	164	5	0.542717	PGBD5	84716	GALNT2	225719	chr22	29178721	29178862	142	4	-0.520563	CCDC117	10130	XBP1	17793	chr17	60593529	60593582	54	5	0.576436	MRC2	-111206	TLK2	37170	chr16	89069833	89069887	55	6	0.551246	ACSF3	-90357	CBFA2T3	-26248	chr3	169377635	169378355	721	11	-0.554269	MECOM	-513902	ACTRT3	109688
chr1	231475643	231476069	427	20	0.641492	EXOC8	-2278	SPRTN	2062	chr22	36917854	36917938	85	4	-0.688474	FOXRED2	-14748	EIF3D	7587	chr17	66101238	66101302	65	4	-0.587261	AMZ2	-142445	KPNA2	69194	chr16	89666962	89667020	59	5	0.603509	DPEP1	-20009	CPNE7	24815	chr4	53577135	53577572	438	4	0.53373	USP46	-51852	ERVMER34-1	40453
chr1	233116794	233116888	95	4	0.512321	NTPCR	30471	PCNXL2	314618	chr22	39337616	39337972	357	5	0.570469	CBX6	-69475	APOBEC3A	-10962	chr17	71089369	71089438	70	4	0.533384	SLC39A11	-577			chr17	20184120	20185682	1563	4	-0.617463	LGALS9B	185947	SPECC1	194566	chr4	181449230	181449383	154	5	0.515354	NONE
chr1	237490561	237490832	272	4	0.519035	RYR2	285192	ZP4	563397	chr3	13304459	13308969	4511	4	-0.5689	IQSEC1	-297546	NUP210	155095	chr17	73972345	73972722	378	4	0.513109	TEN1	-2767			chr17	65433949	65434045	97	5	-0.585347	NOL11	-279952	PITPNC1	59726	chr4	188282979	188283104	126	4	0.510788	FAT1	-638033	ZFP42	-633883
chr1	243451450	243451544	95	4	-0.528744	SDCCAG8	32139	AKT3	561933	chr3	57741006	57743171	2166	5	0.503445	SLMAP	132			chr17	77638489	77639656	1168	6	0.602246	RBFOX3	-160510	ENPP7	-65608	chr18	8730590	8730641	52	5	-0.54069	NDUFV2	-372012	SOGA2	13247	chr5	15008177	15008861	685	7	0.596031	FBXL7	-491786	ANKH	-136632
chr1	244096718	244096920	203	5	-0.506316	ZBTB18	-117766	AKT3	-83389	chr3	194869615	194870097	483	4	0.514032	LSG1	-476650	XXYLT1	122040	chr18	379659	379748	90	4	-0.571913	THOC1	-111677	COLEC12	121018	chr18	22049785	22049849	65	4	0.575538	HRH4	9224	ZNF521	882299	chr5	115697252	115697303	52	6	0.553061	SEMA6A	213352	COMMD10	276590
chr1	244475473	244475566	94	4	-0.634191	ADSS	139916	ZBTB18	260935	chr4	84633478	84633531	54	5	0.536379	AGPAT9	176244	NKX6-1	786098	chr18	60458242	60458322	81	4	0.591259	PHLPP1	75599	BCL2	529079	chr18	33019232	33019308	77	5	0.50454	ZNF396	-61969	ENSG00000267140	58634	chr5	178887536	178887679	144	6	0.551526	ADAMTS2	-115177	RUFY1	-89951
chr2	2661546	2668326	6781	5	0.694742	TRAPPC12	-718521	MYT1L	-330048	chr4	129484812	129484913	102	5	-0.520891	PGRMC2	-274879	JADE1	-245916	chr18	67616257	67616380	124	4	-0.628589	CD226	7913	DOK6	548028	chr18	61091410	61091463	54	4	0.526713	VPS4B	-1741			chr6	1063984	1064424	441	5	0.511133	EXOC2	-371093	FOXQ1	-248471
chr2	3226579	3228371	1793	8	0.524391	MYT1L	-892587	TRAPPC12	-155982	chr4	157863234	157863328	95	4	-0.549184	CTSO	-988212	PDGFC	29265	chr18	74766692	74767082	391	6	-0.607557	MBP	77838	ZNF236	230771	chr19	2960100	2960479	380	11	0.564456	TLE6	-17154	ZNF77	-15359	chr6	5647943	5648154	212	4	0.568095	NRN1	359151	FARS2	386772
chr2	6864430	6864653	224	4	-0.541932	CMPK2	141285			chr4	178251254	178251312	59	4	0.619006	NEIL3	20293	AGA	112374	chr19	4916562	4916854	293	6	-0.582662	KDM4B	-52424	PLIN3	-48928	chr19	11059118	11059205	88	7	0.505764	SMARCA4	-12515	C19orf52	19753	chr6	6269421	6270461	1041	4	-0.574299	NRN1	-262741	F13A1	51126
chr2	8682362	8683756	1395	4	-0.622535	ID2	-135916			chr5	10509803	10509911	109	4	-0.589179	ROPN1L	68221	DAP	251527	chr19	14481138	14481293	156	4	-0.570868	LPHN1	-164217	CD97	-11040	chr19	13108187	13108237	51	5	0.533066	NFIX	1790	LYL1	105469	chr6	7261215	7262379	1165	4	0.515223	SSR1	51643	RREB1	153756
chr2	13560120	13560853	734	4	-0.525778	TRIB2	703472			chr5	74336035	74336090	56	4	-0.577531	HMGCR	-296930	GCNT4	-9339	chr2	10682261	10682319	59	4	0.55866	ODC1	-93660	NOL10	147803	chr19	13129284	13129382	99	6	0.714026	NFIX	22911	LYL1	84348	chr6	18119634	18119737	104	4	-0.528118	KIF13A	-131886	NHLRC1	3165
chr2	24398468	24398520	53	4	0.55432	PFN4	-52147	ITSN2	185089	chr6	18040759	18041404	646	4	-0.647743	KIF13A	-53282	NHLRC1	81769	chr2	145216430	145216709	280	5	-0.577621	GTDC1	-223263	ZEB2	62051	chr19	16198888	16198954	67	5	0.568216	RAB8A	-23518	TPM4	20573	chr6	25882373	25882434	62	8	0.670086	SLC17A3	-7933	SLC17A2	48435
chr2	38742444	38742640	197	7	0.550853	ATL2	-138138	HNRNPLL	87629	chr6	44424513	44424570	58	4	-0.542723	RUNX2	-871564	CDC5L	69280	chr2	198355981	198356086	106	7	0.506417	HSPE1	-8684	COQ10B	37887	chr19	33867970	33868061	92	4	0.500732	CEBPG	3780	PEPD	144684	chr6	28663014	28665327	2314	29	0.546628	SCAND3	-109059	TRIM27	227595
chr2	48660572	48661341	770	5	0.524832	PPP1R21	-6979	FOXN2	119108	chr6	158619635	158619734	100	6	0.56838	TULP4	-114007	GTF2H5	30301	chr20	11788174	11789578	1405	4	0.566893	BTBD3	-82600			chr19	35608047	35608148	102	4	0.680796	FXYD3	932			chr6	108603956	108604057	102	4	0.5285	SNX3	-21543	LACE1	-12091
chr2	60291907	60291998	92	4	0.568332	BCL11A	488680			chr7	2832917	2832990	74	10	0.516229	GNA12	51004	AMZ1	113798	chr22	19825520	19825636	117	6	-0.624255	C22orf29	16831	TBX1	81352	chr19	48283436	48283555	120	6	0.544081	SEPW1	1667	TPRX1	23450	chr6	161174933	161175411	479	4	0.515831	MAP3K4	-237644	PLG	51898
chr2	65889806	65890213	408	7	0.525779	MEIS1	-772522	SPRED2	-230699	chr7	72994711	72994761	51	4	-0.549735	TBL2	-1615			chr22	38281925	38281993	69	5	0.523586	MICALL1	-20345	EIF3L	37084	chr19	53447585	53447661	77	4	0.539361	ZNF320	-46810	ZNF816	18491	chr7	135477639	135477742	104	4	0.510767	FAM180A	-44097	MTPN	184373
chr2	71846112	71846176	65	5	0.511633	DYSF	152312	CYP26B1	529023	chr7	108168683	108168767	85	4	0.557137	PNPLA8	-2087			chr22	46436396	46436464	69	4	-0.52005	PPARA	-110069	WNT7B	-63421	chr2	11515031	11515082	52	4	0.686085	ROCK2	-30346	E2F6	91218	chr8	90913517	90913577	61	4	0.525516	OSGIN2	-1215
chr2	83619993	83620089	97	4	0.597244	NONE				chr8	25337121	25337243	123	4	-0.603742	CDCA2	20669	EBF2	565731	chr22	46438139	46438203	65	4	0.513568	PPARA	-108328	WNT7B	-65162	chr2	25573241	25573342	102	4	-0.51818	DNMT3A	-7833	DTNB	323211	chr8	92735655	92735775	121	4	-0.514959	RUNX1T1	371991	SLC26A7	474180
chr2	86455731	86456013	283	6	0.507873	MRPL35	29292	REEP1	109334	chr8	28206070	28206150	81	4	0.765161	PNOC	31461	ZNF395	37873	chr3	12396371	12396587	217	4	-0.516203	TSEN2	-129531	PPARG	3508	chr2	43859116	43859221	106	5	0.52041	THADA	-36056	PLEKHH2	-5243	chr8	141220160	141220218	59	6	0.615879	TRAPPC9	248489	C8orf17	276773
chr2	95537267	95537391	125	11	0.530105	TEKT4	141			chr8	39970658	39970810	153	4	0.515897	C8orf4	-40255	IDO2	178260	chr3	31577085	31577140	56	4	0.528695	STT3B	2831	OSBPL10	445681	chr2	75118017	75118082	66	4	-0.604789	POLE4	-67569	HK2	56942	chr9	116101804	116101925	122	4	-0.517212	RNF183	-39820	BSPRY	-9956
chr2	97553247	97553303	57	5	0.602479	SEMA4C	-17567	FAHD2B	207301	chr8	82185246	82185368	123	4	-0.61301	PAG1	-161004	FABP5	-7291	chr3	121612748	121612820	73	4	0.512871	SLC15A2	-152			chr2	88488526	88488635	110	5	0.573526	TEX37	-335588	THNSL2	17602	chr9	138339180	138339399	220	8	0.522206	PPP1R26	-32358	OLFM1	371924
chr2	99483859	99487947	4089	4	0.560427	ENSG00000273045	-272045	MGAT4A	-142744	chr9	6955559	6955641	83	5	0.547785	KDM4C	197944	TMEM261	844467	chr3	170897216	170897280	65	4	0.577022	SLC2A2	-152709	TNIK	280949	chr2	132152987	132153041	55	5	0.653279	TUBA3D	-80652	POTEE	177132	chr9	140059530	140059581	52	4	0.526691	LRRC26	4947	GRIN1	25623
chr2	114099657	114100302	646	6	-0.586066	CBWD2	-95288	PAX8	-63453	chrX	70133122	70133359	238	4	-0.510038	TEX11	-4680			chr4	79611230	79611281	52	5	0.638002	BMP2K	-86276	ANXA3	138583	chr2	136361379	136361473	95	5	0.534941	UBXN4	-137763	R3HDM1	72343	chrX	1659831	1659903	73	5	0.554795	P2RY8	-3867
chr2	139394659	139394875	217	4	0.625971	SPOPL	135396	NXPH2	143151											chr4	165172597	165172775	179	4	0.559239	2020-03-01	132516	TMA16	757073	chr2	232206979	232207482	504	4	-0.559949	B3GNT7	-53023	ARMC9	143971	chrX	2994672	2994725	54	7	0.602867	ARSF	35187	MXRA5	269983
chr2	161330718	161331175	458	8	0.506793	ITGB6	-274135	RBMS1	19358											chr5	6787666	6787720	55	4	0.676669	ADCY2	-608628	PAPD7	72975	chr2	234121892	234121948	57	4	0.606627	ATG16L1	-38297	INPP5D	196731	chrX	146784482	146784571	90	4	0.528831	FMR1	-209043
chr2	166993395	166997257	3863	4	0.557185	SCN1A	-65195	SCN9A	237177											chr5	14206264	14206684	421	4	-0.548784	FAM105B	-458383	TRIO	62663	chr2	240174548	240174640	93	7	-0.533803	HDAC4	148049	TWIST2	417921	chrY	15676834	15676905	72	7	0.885186	TMSB4Y	-138577	UTY	-84317
chr2	169073107	169073189	83	4	0.522681	STK39	31503	B3GALT1	347690											chr5	115471174	115471281	108	4	-0.658979	COMMD10	50540	SEMA6A	439402	chr20	34670700	34670791	92	6	0.529951	EPB41L1	-71926	CNBD2	114217
chr2	206723874	206723953	80	6	0.858816	NRP2	176690	INO80D	226992											chr5	171541723	171541807	85	6	-0.501202	FBXW11	-108121	STK10	73625	chr20	39319752	39320939	1188	6	-0.679328	MAFB	-2466
chr2	209330326	209330794	469	8	0.649493	PTH2R	59004													chr5	176551269	176551357	89	4	-0.523715	NSD1	-9613	FGFR4	37426	chr20	61027937	61028010	74	4	-0.576197	RBBP8NL	-25385	GATA5	23052
chr2	217516516	217520219	3704	5	0.545028	IGFBP2	20250	IGFBP5	41880											chr6	85257239	85257315	77	4	0.636377	KIAA1009	-319924	TBX18	216960	chr21	41656604	41656665	62	4	0.51119	PCP4	417392	DSCAM	562430
chr2	218653875	218653929	55	4	-0.596986	TNP1	-929115	TNS1	154949											chr6	108143880	108144034	155	4	-0.501988	SCML4	1559	SOBP	332795	chr21	45797801	45797896	96	5	0.572409	LRRC3	-77520	TRPM2	24710
chr2	233278239	233280700	2462	5	-0.643289	ALPI	-41363	ALPPL2	7917											chr7	6366800	6367546	747	4	0.637258	CYTH3	-54898	FAM220A	21417	chr22	21967222	21967319	98	4	0.533788	RIMBP3C	-61521	YDJC	17082
chr2	240186149	240186255	107	4	-0.536416	HDAC4	136441	TWIST2	429529											chr7	6496683	6496743	61	4	0.558969	DAGLB	-9070	KDELR2	27160	chr22	24995708	24995832	125	5	0.511749	GGT1	-3398
chr2	241483961	241484076	116	7	0.505033	ANKMY1	13361	GPC1	108931											chr7	76023679	76023877	199	6	-0.536125	YWHAG	-35430	SRCRB4D	15234	chr22	30617390	30617470	81	7	0.645121	LIF	25410	HORMAD2	141267
chr3	13787881	13787971	91	4	-0.782477	WNT7A	133692	FBLN2	197295											chr7	137154759	137154861	103	5	0.605012	PTN	-126199	DGKI	376799	chr22	30625225	30625276	52	4	0.650069	LIF	17589	HORMAD2	149088
chr3	19032067	19032318	252	7	0.532689	SATB1	-566128	KCNH8	-157753											chr9	6842404	6842492	89	4	0.513036	KDM4C	84792	TMEM261	957619	chr22	30666910	30666964	55	4	-0.704446	OSM	-4108
chr3	22580440	22580700	261	4	-0.526128	ZNF385D	-787643	UBE2E2	-664214											chr9	17005412	17005522	111	4	0.578181	BNC2	-134763	CNTLN	-129513	chr3	52532368	52532426	59	4	-0.628923	STAB1	3043	NT5DC2	35396
chr3	32511707	32511771	65	4	0.700259	CMTM6	33161	CMTM7	78576											chr9	80745242	80745309	68	4	0.602982	CEP78	-105847	GNAQ	-98902	chr3	195908699	195908850	152	6	-0.537025	TFRC	-99715	ZDHHC19	29491
chr3	41282685	41283268	584	4	-0.523967	CTNNB1	42047	ULK4	720945											chrX	154445543	154445593	51	4	-0.548007	VBP1	925			chr4	24689152	24689222	71	4	-0.584724	SOD3	-107898	DHX15	-103014
chr3	47916980	47917353	374	7	0.553749	DHX30	72749	MAP4	213595																					chr4	84645668	84645939	272	7	0.546653	AGPAT9	188543	NKX6-1	773799
chr3	73858239	73858341	103	4	0.533837	PDZRN3	-184199	CNTN3	712001																					chr5	3311463	3311525	63	4	-0.563353	IRX1	-284674	C5orf38	559232
chr3	77821533	77823619	2087	4	0.52508	NONE																								chr5	14748753	14748835	83	5	0.55716	FAM105B	83937	ANKH	123093
chr3	107416968	107417050	83	4	-0.518943	BBX	175186	CD47	392852																					chr5	119399903	119399955	53	4	0.525587	PRR16	-400090	FAM170A	434636
chr3	111846602	111846890	289	5	-0.578525	GCSAM	5355	C3orf52	41564																					chr5	168540850	168541050	201	4	0.544816	PANK3	-534345	SLIT3	187183
chr3	129328813	129329118	306	8	0.54075	PLXND1	-3305																							chr5	169821227	169821305	79	6	-0.60335	KCNMB1	-4585
chr3	152587960	152588025	66	4	0.520831	RAP2B	-292036	P2RY1	35257																					chr6	24647358	24647446	89	8	0.50856	KIAA0319	-1019
chr3	169742750	169743184	435	4	-0.50267	GPR160	-12750	SEC62	58414																					chr6	28945493	28945566	74	10	0.503474	TRIM27	-53764	ZNF311	27507
chr3	177098713	177098796	84	5	0.541299	TBL1XR1	-184489																							chr6	37027355	37027415	61	6	0.62526	PIM1	-110594	FGD2	53962
chr3	189509045	189509535	491	4	0.579687	TP63	160074	LEPREL1	329428																					chr6	39211825	39211908	84	5	0.612771	KCNK5	-14641	KCNK17	70462
chr3	195323337	195323446	110	5	-0.557129	MUC20	-124361	APOD	-12316																					chr6	110093696	110093785	90	4	-0.607728	GPR6	-206557	FIG4	81226
chr4	1324683	1324792	110	5	0.620017	UVSSA	-16366	MAEA	41099																					chr6	157931868	157931934	67	4	0.591848	SNX9	-312395	ZDHHC14	129736
chr4	9836580	9836772	193	4	0.718669	DRD5	53418	SLC2A9	186431																					chr6	159316196	159316337	142	4	0.55583	EZR	-75823	RSPH3	104931
chr4	18594185	18594442	258	5	-0.516901	LCORL	-570831																							chr6	164211379	164211535	157	4	0.580277	QKI	375782
chr4	32717596	32717713	118	5	-0.505499	NONE																								chr6	169977358	169977440	83	12	-0.519769	THBS2	-323260	WDR27	124350
chr4	39569619	39569830	212	5	0.727032	UGDH	-40487	SMIM14	70985																					chr7	98821864	98821921	58	5	0.501196	ARPC1A	-101640	KPNA7	-16764
chr4	40814408	40814572	165	4	-0.507082	NSUN7	62576	APBB2	402059																					chr7	100126389	100126483	95	4	0.565129	AGFG2	-10412	NYAP1	44886
chr4	68503902	68504145	244	5	-0.529748	UBA6	62873	STAP1	79578																					chr7	100343015	100343065	51	4	-0.515017	EPO	24617	EPHB4	82081
chr4	76620849	76620929	81	4	0.502089	USO1	-29115	G3BP2	-21736																					chr7	101794661	101794725	65	4	0.600588	SH2B2	-133712	CUX1	335402
chr4	99852061	99852318	258	4	0.505609	EIF4E	-1906																							chr8	42358334	42358746	413	4	0.675989	SMIM19	-37758	VDAC3	109119
chr4	101987882	101987990	109	6	-0.545454	EMCN	-548686	PPP3CA	280701																					chr8	54442087	54442157	71	8	0.502395	OPRK1	-277865	ATP6V1H	313700
chr4	103536111	103536194	84	7	-0.5008	NFKB1	113667	MANBA	145998																					chr8	116899113	116899266	154	4	0.514464	TRPS1	-217962	EIF3H	868870
chr4	112971477	112971731	255	4	0.634418	C4orf32	-94949																							chr8	124197344	124197406	63	5	0.624512	FAM83A	6088	ZHX1	89360
chr4	130469387	130469560	174	4	0.533963	SCLT1	-454712																							chr9	77461620	77461745	126	4	0.594842	TRPM6	41327	RORB	349402
chr4	148750630	148750771	142	5	-0.578178	ARHGAP10	97487	NR3C2	612971																					chr9	90836011	90836441	431	7	0.509791	CDK20	-246559	SPIN1	-167108
chr4	169614733	169615064	332	7	-0.587706	PALLD	196644	CBR4	316510																					chr9	97818542	97818593	52	5	0.562721	FANCC	261416	C9orf3	296502
chr4	171583653	171583774	122	4	0.56607	AADAT	-572596																							chr9	116345098	116345191	94	4	0.590146	ZNF618	-293417	RGS3	138134
chr4	185251292	185251345	54	7	0.722821	ENPP6	-112205	IRF2	144415																					chr9	116997483	116997535	53	4	-0.500965	ORM1	-87827	COL27A1	79669
chr5	55969381	55970528	1148	4	0.502228	IL6ST	-679134	MAP3K1	-141446																					chr9	129250270	129250332	63	6	-0.572059	LMX1B	-126421	MVB12B	161173
chr5	60138832	60139011	180	6	0.638794	DEPDC1B	-142934	ELOVL7	1294																					chr9	140542190	140542269	80	6	-0.533391	CACNA1B	-230011	EHMT1	28776
chr5	90799340	90799549	210	5	0.677701	ARRDC3	-120269
chr5	92735301	92735649	349	4	0.524598	NR2F1	-183568
chr5	117744781	117746493	1713	4	-0.502497	DTWD2	578603
chr5	126149618	126149674	57	4	-0.517665	LMNB1	36806	2019-03-03	216854
chr5	142209963	142210191	229	5	-0.542723	ARHGAP26	60128	NR3C1	573177
chr5	147451975	147452237	263	4	0.538012	SPINK14	-97190	SPINK5	8571
chr5	149861203	149861415	213	4	-0.512149	RPS14	-31999	NDST1	-26365
chr5	170798162	170798272	111	4	0.579371	NPM1	-16435	TLX3	61929
chr5	179908000	179908233	234	4	-0.577105	GFPT2	-127730	CNOT6	-13316
chr6	2142046	2142097	52	4	-0.562727	GMDS	103854	FOXC1	531391
chr6	3298283	3298346	64	4	0.506491	PSMG4	39129	SLC22A23	158478
chr6	8330116	8330235	120	4	-0.507725	EEF1E1	-227365	SLC35B3	105540
chr6	27232676	27232732	57	4	-0.516187	PRSS16	17202	POM121L2	47245
chr6	30752917	30753041	125	6	-0.585317	DDR1	-98882	IER3	-40648
chr6	37947430	37947495	66	4	0.507856	ZFAND3	160188	BTBD9	660237
chr6	41802973	41803408	436	4	0.595877	TOMM6	47791	USP49	59908
chr6	42256783	42257201	419	6	0.511457	MRPS10	-71389	TRERF1	162791
chr6	85256156	85256303	148	6	-0.500371	KIAA1009	-318877	TBX18	218007
chr6	131602870	131603118	249	5	-0.567273	ARG1	-291371	AKAP7	146188
chr6	147882895	147882989	95	4	0.60137	SASH1	-780787	STXBP5	357273
chr6	167881163	167881319	157	4	-0.548231	TCP10	-83287	C6orf123	316298
chr6	167894279	167895159	881	5	0.524135	TCP10	-96765	C6orf123	302820
chr7	1555865	1555990	126	6	-0.544731	MAFK	-14422	INTS1	-11925
chr7	2152591	2152675	85	6	-0.50119	MAD1L1	120245	ELFN1	424878
chr7	5214885	5214987	103	6	0.528266	WIPI2	-14883	RBAK	129383
chr7	5890789	5890840	52	4	0.50885	RNF216	-69445	OCM	-29614
chr7	7515425	7516426	1002	5	-0.518228	COL28A1	59558	C1GALT1	293680
chr7	12090520	12090703	184	4	0.607803	THSD7A	-218788	TMEM106B	-160314
chr7	17594301	17594462	162	4	-0.542986	AHR	256136	SNX13	385735
chr7	26130334	26130395	62	4	-0.537367	NPVF	-862260	NFE2L3	-61495
chr7	29217803	29218070	268	6	0.635336	CHN2	-16091	CREB5	765793
chr7	31671387	31671567	181	5	0.530402	PPP1R17	-54852	CCDC129	102106
chr7	47823776	47824796	1021	4	0.507575	TNS3	-245087	C7orf69	-10603
chr7	50425462	50425514	53	4	-0.604117	IKZF1	77170	FIGNL1	91934
chr7	63643170	63643226	57	6	0.523057	ZNF679	-45654	ZNF727	137377
chr7	65673529	65673600	72	4	0.567011	KCTD7	-532078	TPST1	3379
chr7	66331115	66331611	497	4	0.581466	TMEM248	-54849	RABGEF1	125643
chr7	95664370	95665282	913	9	0.557187	DYNC1I1	262924	SLC25A13	286633
chr7	105945937	105946465	529	5	0.503923	NAMPT	-20563	CCDC71L	355241
chr7	128909882	128910111	230	4	-0.566928	STRIP2	-164277	AHCYL2	45133
chr7	133694673	133694928	256	4	0.517529	LRGUK	-117251	EXOC4	756972
chr7	140058152	140058327	176	4	-0.539613	KDM7A	-181405	SLC37A3	40109
chr7	147399623	147400280	658	5	0.506485	CUL1	-996052
chr7	150724866	150724937	72	5	-0.55571	ATG9B	-3316	ABCB8	-608
chr7	157294567	157294625	59	4	-0.628723	DNAJB6	164936
chr8	6810214	6811018	805	5	-0.507991	DEFA4	-14756	DEFA1	26986
chr8	11571901	11572041	141	4	-0.513646	C8orf49	-46925	GATA4	10258
chr8	27845878	27846035	158	8	-0.59875	PBK	-150345	SCARA5	4287
chr8	35431115	35431590	476	6	0.65113	UNC5D	338378
chr8	36839788	36839971	184	4	0.599126	ZNF703	-713389	KCNU1	197988
chr8	78411665	78411795	131	4	0.557917	PEX2	-498450
chr8	85016060	85016194	135	5	0.566969	RALYL	-80983
chr8	87212842	87214527	1686	4	-0.592371	SLC7A13	28925	ATP6V0D2	102619
chr8	94941871	94944912	3042	4	0.584472	PDP1	14217	CDH17	277423
chr8	96365815	96365869	55	4	0.847066	C8orf37	-84413	GDF6	807178
chr8	113732731	113733868	1138	4	0.519151	CSMD3	716028
chr8	121553455	121553511	57	4	-0.636629	MTBP	95817	SNTB1	272030
chr8	124877920	124877978	59	4	0.671724	FER1L6	13722	TMEM65	506984
chr8	127837288	127837373	86	5	0.605203	POU5F1B	-589204	FAM84B	-266693
chr8	140901992	140902074	83	4	-0.66964	KCNK9	-186734	C8orf17	-41383
chr8	141185459	141186227	769	7	0.550972	C8orf17	242427	TRAPPC9	282835
chr8	141665061	141665154	94	4	-0.583971	AGO2	-19390	PTK2	346149
chr8	142413932	142413982	51	5	-0.56669	PTP4A3	11864
chr8	143143005	143143960	956	4	0.585164	TSNARE1	341060	PTP4A3	741390
chr9	14311857	14312343	487	5	0.545062	NFIB	1566
chr9	14345873	14346545	673	14	-0.518445	NFIB	-32543	ZDHHC21	347260
chr9	14366194	14366258	65	4	0.517598	NFIB	-52560	ZDHHC21	327243
chr9	22051235	22052692	1458	4	-0.509175	DMRTA1	-394876	CDKN2B	-42602
chr9	27413957	27414854	898	4	0.531012	EQTN	-117269	IFNK	-109906
chr9	29566583	29566971	389	5	0.614244	LINGO2	-896494
chr9	37406910	37409694	2785	4	0.600298	GRHPR	-14361	ZCCHC7	287766
chr9	71445651	71445777	127	4	0.636623	FAM122A	50750	PRKACG	183325
chr9	71643486	71644311	826	7	-0.530412	PRKACG	-14860	FXN	-6276
chr9	72459410	72459519	110	4	0.531247	MAMDC2	-199032	C9orf135	23756
chr9	87438735	87438894	160	4	0.509142	NTRK2	155349	AGTPBP1	917918
chr9	88588041	88588145	105	4	0.547663	NAA35	32032	GOLM1	126380
chr9	91924887	91924937	51	4	0.554878	CKS2	-1201
chr9	93835437	93837812	2376	5	0.603094	SYK	272556	AUH	287570
chr9	101183395	101183629	235	6	-0.514715	TBC1D2	-165597	GABBR2	287967
chr9	110716855	110716950	96	4	-0.54486	KLF4	-464976	ACTL7B	902336
chr9	110731187	110734388	3202	4	0.604268	KLF4	-480861	ACTL7B	886451
chr9	114392583	114394937	2355	4	0.515312	DNAJC25-GNG10	94	DNAJC25	128
chr9	116333159	116333244	86	4	0.51382	ZNF618	-305360	RGS3	126191
chr9	116547742	116547855	114	4	0.502795	ZNF618	-90763	RGS3	340788
chr9	123273276	123273359	84	4	0.59184	CDK5RAP2	69118
chr9	127427833	127428129	297	4	0.525226	NR5A1	-158272	NR6A1	105575
chr9	127634807	127634870	64	4	-0.601604	ARPC5L	10430	GOLGA1	68539
chr9	128521950	128522199	250	6	-0.515202	MVB12B	-567053	PBX3	12358
chr9	128592188	128592444	257	4	-0.519986	MVB12B	-496812	PBX3	82599
chr9	131092577	131092692	116	6	-0.500362	SLC27A4	-10372	TRUB2	-7614
chr9	131839547	131839845	299	6	0.555869	DOLPP1	-3683
chr9	136405836	136405917	82	6	0.784678	ADAMTSL2	8591	FAM163B	45442
chr9	136521604	136521654	51	4	0.627399	DBH	20147	SARDH	83413
chr9	140168544	140169404	861	6	0.668456	TOR4A	-3227
chr10	1643797	1643952	156	8	0.514824	ADARB2	135795	WDR37	548397
chr10	4086093	4086466	374	4	-0.598009	AKR1E2	-782166	KLF6	-258813
chr10	7761238	7761303	66	4	-0.509287	ITIH2	16039	KIN	68673
chr10	13262444	13264048	1605	6	0.514272	UCMA	13085	MCM10	59667
chr10	15077211	15077285	75	5	0.526617	OLAH	-8714	MEIG1	75810
chr10	24754430	24755038	609	4	0.885483	KIAA1217	256641	ARHGAP21	257863
chr10	27771135	27772178	1044	5	-0.514371	PTCHD3	-68360	RAB18	-21540
chr10	28407333	28407530	198	4	0.504726	ARMC4	-119455	MPP7	161639
chr10	33200467	33200703	237	5	-0.574531	EPC1	-564472	ITGB1	46237
chr10	36967998	36968107	110	5	0.500188	ANKRD30A	-446732
chr10	61504576	61504762	187	5	0.519464	SLC16A9	-34832	CCDC6	161745
chr10	69664114	69664588	475	7	0.733833	SIRT1	19924	HERC4	170689
chr10	73634720	73634947	228	4	0.508747	CHST3	-89289	PSAP	-23708
chr10	75818489	75818684	196	5	-0.69531	VCL	60715	AP3M1	92234
chr10	79625634	79625729	96	5	0.535861	KCNMA1	-228282	DLG5	60602
chr10	88734256	88734936	681	5	0.540491	ADIRF	6647	GLUD1	120027
chr10	96442032	96442584	553	4	0.521547	CYP2C18	-1070
chr10	124217987	124219565	1579	8	0.502603	HTRA1	-2265
chr10	126248716	126248895	180	5	-0.53739	LHPP	98402	FAM53B	183813
chr10	129775899	129775971	73	4	-0.565462	PTPRE	70610	MKI67	148714
chr10	131555549	131555849	301	6	-0.50699	EBF3	206406	MGMT	290251
chr10	133992228	133994340	2113	25	0.574839	DPYSL4	-7120	JAKMIP3	75109
chr10	134826206	134826305	100	10	-0.592647	GPR123	-75153	TTC40	-70167
chr11	741265	741396	132	7	0.528736	TALDO1	-5998	EPS8L2	35214
chr11	6218140	6222503	4364	4	-0.503724	OR52W1	-54
chr11	12746049	12746133	85	5	-0.705835	TEAD1	-20497	PARVA	347359
chr11	21417889	21418316	428	4	0.540186	ANO5	-796619	NELL1	726985
chr11	37930126	37930283	158	5	0.542052	NONE
chr11	45354636	45354905	270	4	-0.527002	SYT13	-46901	CHST1	332401
chr11	48036845	48036988	144	4	-0.572645	OR4B1	-201427	PTPRJ	34804
chr11	65327786	65328416	631	4	0.618446	LTBP3	-2402
chr11	65883219	65883325	107	5	-0.52194	KLC2	-141493	PACS1	45347
chr11	68623374	68623481	108	5	-0.518572	CPT1A	-14044	MRPL21	47860
chr11	108569449	108569621	173	5	0.706847	C11orf87	-723311	DDX10	33783
chr11	113306738	113306812	75	5	0.649523	DRD2	39336	ANKK1	48262
chr11	129460791	129462324	1534	4	0.563848	TMEM45B	-224156	BARX2	215723
chr11	129820966	129822178	1213	5	-0.517825	NFRKB	-58668	PRDM10	51158
chr11	132157194	132158133	940	7	0.523141	NTM	376308	OPCML	655902
chr11	134811164	134812719	1556	4	0.546136	B3GAT1	-549695
chr12	9911175	9911225	51	6	-0.586254	CLECL1	-25305	CD69	2297
chr12	20197771	20197886	116	7	0.50667	PDE3A	-324350	AEBP2	605221
chr12	50633249	50633568	320	5	-0.517514	CERS5	-72204	LIMA1	43880
chr12	99652840	99652896	57	5	0.544818	FAM71C	-388663	APAF1	613949
chr12	113705082	113705361	280	5	0.555135	TPCN1	45957	SLC8B1	67613
chr12	116823902	116823961	60	4	-0.613939	MAP1LC3B2	-173254	MED13L	-108789
chr12	123284363	123284432	70	5	-0.728242	HIP1R	-35575	CCDC62	25524
chr12	125008438	125011783	3346	5	0.552263	NCOR2	-30313	SCARB1	338282
chr13	30682436	30683816	1381	4	0.513371	UBL3	-258305	KATNAL1	198495
chr13	31776098	31776184	87	5	0.592108	RXFP2	-537538	B3GALTL	2068
chr13	40429637	40431888	2252	4	0.55402	COG6	200949	FOXO1	809971
chr13	48767611	48767775	165	4	-0.523261	MED4	-98453	ITM2B	-39601
chr13	55067235	55067392	158	4	0.521282	NONE
chr13	97927598	97927825	228	4	0.604983	RAP2A	-158764	MBNL2	53103
chr13	106929698	106930285	588	4	0.549121	EFNB2	257470	DAOA	811400
chr13	110722984	110723445	462	6	0.515993	IRS2	-284300	COL4A1	236281
chr13	111280884	111281877	994	6	0.50201	CARKD	13373	CARS2	77123
chr13	114908217	114908407	191	7	-0.513542	CDC16	-92050	RASA3	-10226
chr14	19003794	19003889	96	4	-0.50399	OR11H12	-373680
chr14	24799145	24799216	72	6	-0.666817	ADCY4	5096	LTB4R	16664
chr14	30504732	30505231	500	4	-0.505497	G2E3	-523347	PRKD1	-108034
chr14	37123643	37123700	58	5	-0.61565	NKX2-8	-71860	PAX9	-7398
chr14	42274919	42275002	84	4	-0.654659	LRFN5	198188
chr14	52348104	52348226	123	5	-0.50082	C14orf166	-108028	GNG2	21033
chr14	53976736	53976923	188	5	0.639337	DDHD1	-357014	BMP4	446699
chr14	69809832	69809904	73	6	0.600683	ERH	55476	GALNT16	83187
chr14	77640898	77641016	119	6	0.500626	ZDHHC22	-32823	TMEM63C	-7213
chr14	79167694	79167881	188	4	0.597939	NRXN3	297695
chr14	81015540	81015640	101	5	0.630722	DIO2	-337747	CEP128	392539
chr14	85890202	85890593	392	4	-0.541413	FLRT2	-106090
chr14	94226495	94226572	78	4	-0.586167	PRIMA1	28293	COX8C	412997
chr14	98969784	98969892	109	4	0.521139	BCL11B	767727
chr14	100277550	100277665	116	4	0.610543	EVL	-254007	EML1	17928
chr15	26877653	26877859	207	4	0.53734	ATP10A	-769401	GABRB3	140465
chr15	57539070	57539345	276	5	-0.540211	CGNL1	-129495	TCF12	328387
chr15	61129610	61129754	145	5	0.634821	RORA	-210020
chr15	71074005	71074512	508	7	0.512177	UACA	-18327	LARP6	72239
chr15	78741501	78741650	150	4	0.558718	HYKK	-58330	IREB2	11045
chr15	80729545	80729627	83	5	-0.538386	ABHD17C	-258058	ARNT2	32893
chr15	80781280	80781450	171	4	-0.543244	ABHD17C	-206279	ARNT2	84672
chr15	89178755	89178857	103	4	-0.514391	ISG20	-3168
chr15	89560286	89561491	1206	4	0.504046	MFGE8	-104247	ABHD2	-70492
chr15	89936679	89938975	2297	5	-0.684057	POLG	-59749	RHCG	102017
chr15	98255901	98255968	68	4	0.503727	ARRDC4	-247993	SPATA8	929316
chr15	99510622	99510798	177	4	0.541547	PGPEP1L	38081	IGF1R	318510
chr16	2137025	2141532	4508	13	-0.517543	NTHL1	-41412	PKD1	46620
chr16	4661365	4661436	72	5	0.748331	CDIP1	-96291	MGRN1	-13390
chr16	13273697	13274084	388	5	-0.508999	ERCC4	-740123	SHISA9	278414
chr16	17665638	17665854	217	5	0.574518	XYLT1	-101008	NPIPA8	764847
chr16	58502209	58503567	1359	4	-0.651015	SETD6	-46504	NDRG4	4960
chr16	79361536	79361637	102	5	0.602935	MAF	273024
chr16	80236221	80237967	1747	5	0.502019	MAF	-602483	DYNLRB2	-337760
chr17	437360	437618	259	4	-0.514719	FAM101B	-141759	VPS53	180607
chr17	1633332	1633391	60	4	-0.519294	SERPINF2	-12768	WDR81	5108
chr17	3634356	3638413	4058	6	0.661332	GSG2	9174	ITGAE	68152
chr17	4591561	4591783	223	4	-0.618214	ALOX15	-46083	PELP1	15752
chr17	7327313	7327959	647	5	-0.566334	C17orf74	-1298
chr17	11847643	11848440	798	4	0.770381	ZNF18	52647	DNAH9	346294
chr17	30651387	30651487	101	5	0.531009	C17orf75	17771	RHBDL3	58242
chr17	33417003	33417113	111	5	-0.600272	RFFL	-720
chr17	35285044	35285218	175	9	0.541534	LHX1	-8953	MRM1	327130
chr17	37919581	37920209	629	4	0.532689	GRB7	24871	IKZF3	100546
chr17	42646731	42646796	66	5	-0.663062	C17orf104	-87076	FZD2	11839
chr17	46632154	46632211	58	7	0.668599	HOXB3	-899
chr17	48915868	48915994	127	5	0.622079	WFIKKN2	3160	TOB1	27775
chr17	65484396	65484481	86	6	0.643515	NOL11	-229510	PITPNC1	110168
chr17	68098862	68099115	254	4	-0.592506	KCNJ16	-2006
chr17	72038593	72040638	2046	5	0.533885	SDK2	-399388	RPL38	-160176
chr17	74505875	74506063	189	7	0.507123	RHBDF2	-8480	CYGB	28018
chr18	6402702	6402866	165	4	0.536097	TMEM200C	-506830	L3MBTL4	12126
chr18	12027459	12032109	4651	4	-0.585655	CIDEA	-224534	IMPA2	48357
chr18	13057343	13057826	484	5	0.652043	LDLRAD4	-161201	CEP192	66224
chr18	14430517	14430647	131	5	-0.540402	ANKRD30B	-317657	ZNF519	-298153
chr18	26274838	26274968	131	4	-0.531209	CDH2	-517493
chr18	36270558	36270788	231	4	0.504593	NONE
chr18	46345407	46345553	147	5	0.523673	SMAD7	131601	CTIF	279951
chr18	48219899	48220084	186	4	0.724117	MRO	126442	MAPK4	133544
chr18	61143850	61144230	381	8	0.512626	SERPINB5	46
chr18	74098520	74101887	3368	5	0.59453	SMIM21	-960546	ZNF516	106942
chr19	16647908	16648543	636	4	-0.546954	CHERP	5115	C19orf44	41104
chr19	17823151	17823256	106	4	0.52381	UNC13A	-24196	MAP1S	-6957
chr19	32897522	32899068	1547	6	0.668784	PDCD5	-173679	DPY19L3	1264
chr19	38770858	38771421	564	8	0.556049	C19orf33	-23661	SPINT2	16042
chr19	39277460	39277590	131	4	0.500509	LGALS7B	-2326
chr19	45447178	45447240	63	6	-0.529915	APOC2	-3251
chr19	54310390	54310470	81	5	0.524556	NLRP12	17167	DPRX	175120
chr20	3121025	3121320	296	4	0.531809	AVP	-55803	FASTKD5	19370
chr20	6644510	6644635	126	4	0.569938	FERMT1	-540382	BMP2	-103738
chr20	30292192	30292575	384	4	0.598497	BCL2L1	18317	COX4I2	66693
chr20	33779981	33780123	143	5	0.584172	MMP24	-34405	PROCR	20176
chr20	45122831	45124844	2014	9	0.521871	ELMO2	-88582	ZNF334	18355
chr20	49277690	49277762	73	6	0.679826	PARD6B	-70355	PTPN1	150835
chr20	54994133	54994448	316	8	-0.505918	RTFDC1	-49356	CASS4	6977
chr21	32157790	32158164	375	11	-0.553554	KRTAP21-1	-30231	KRTAP8-1	27593
chr21	34734602	34734676	75	6	-0.520431	IFNGR2	-40563	IFNAR1	37430
chr21	35269042	35269298	257	5	-0.515146	ATP5O	19114	ITSN1	254406
chr21	40149503	40149681	179	5	-0.503748	ERG	-115974	ETS2	-27639
chr21	45280533	45282294	1762	5	0.595003	AGPAT3	-63475	RRP1	72020
chr21	46827777	46827891	115	6	0.656253	POFUT2	-120021	COL18A1	-47569
chr22	18056373	18057173	801	4	0.709976	SLC25A18	13634	ATP6V1E1	54811
chr22	30309896	30310188	293	9	0.664236	HORMAD2	-166121	MTMR3	30898
chr22	34207931	34211329	3399	4	-0.503516	SYN3	-755272	LARGE	106779
chr22	39677620	39677806	187	5	-0.558987	PDGFB	-36957	RPL3	38063
chr22	42829640	42829748	109	5	0.674741	NFAM1	-1293
chr22	46008464	46008545	82	8	-0.604096	ATXN10	-59174	FBLN1	109734
chr22	50640514	50640569	56	6	-0.722365	ENSG00000073169	1134	TUBGCP6	42451
chrX	5845371	5846145	775	5	0.746809	NLGN4X	301146
chrX	112132520	112132994	475	8	-0.518789	AMOT	-66403
chrY	19393310	19393608	299	4	-0.561777	CDY2B	598641
[truncated: 10 more columns]

## Sheet: DMP
Supplemental Table 2. List of genes containing DMP and DMR
MZ1							MZ2							MZ3							MZ6							MZ7							MZ8
Chr	Position	Difference	Gene 1	Distance	Gene 2	Distance	Chr	Position	Difference	Gene 1	Distance	Gene 2	Distance	Chr	Position	Difference	Gene 1	Distance	Gene 2	Distance	Chr	Position	Difference	Gene 1	Distance	Gene 2	Distance	Chr	Position	Difference	Gene 1	Distance	Gene 2	Distance	Chr	Position	Difference	Gene 1	Distance	Gene 2	Distance
chr1	16163754	-0.753123	SPEN	-10604	FBLIM1	72761	chr4	53549	0.541349	ZNF595	340			chr1	45280071	-0.80968	TCTEX1D4	-7115	PTCH2	28663	chr1	21724645	-0.738639	ECE1	-109163	NBPF3	-40486	chr1	52615323	0.679995	ZFYVE9	8777	CC2D1B	215042	chr1	64135557	0.753815	ROR1	-102657	PGM1	48293
chr1	16163756	-0.753123	SPEN	-10602	FBLIM1	72763	chr6	129494272	-0.771644	LAMA2	289931	ARHGAP18	537097	chr1	234913189	-0.852101	IRF2BP2	-167919	TOMM20	379061	chr1	201988265	0.753559	GPR37L1	-102221	ELF3	12692	chr1	52616167	0.913411	ZFYVE9	9621	CC2D1B	214198	chr1	64135617	0.753815	ROR1	-102597	PGM1	48353
chr1	16163767	-0.753123	SPEN	-10591	FBLIM1	72774	chr8	28206128	0.720333	PNOC	31480	ZNF395	37854	chr8	23416878	-0.785462	SLC25A37	30561	NKX3-1	123561	chr2	132153021	0.918412	TUBA3D	-79145	POTEE	178639	chr1	52616219	0.860439	ZFYVE9	9673	CC2D1B	214146	chr1	64135621	0.753815	ROR1	-102593	PGM1	48357
chr1	16163776	-0.753123	SPEN	-10582	FBLIM1	72783	chr12	4141700	0.783729	CCND2	-241237	PARP11	-159161	chr10	20078748	0.763119	PLXDC2	-26419	MALRD1	585970	chr5	10869280	0.855273	DAP	-109396			chr1	111583350	-0.74497	CEPT1	-97399	LRIF1	-78149	chr3	107416889	-0.611572	BBX	176566	CD47	391472
chr1	16163780	-0.753123	SPEN	-10578	FBLIM1	72787	chr12	4141713	0.641121	CCND2	-241224	PARP11	-159174	chr11	44359737	0.781765	CD82	-227403	ALX4	-28022	chr5	172110678	0.580495	NEURL1B	43909	DUSP1	86020	chr1	111583352	-0.816665	CEPT1	-97397	LRIF1	-78151	chr3	107416915	-0.751983	BBX	176592	CD47	391446
chr1	25494224	0.774413	RUNX3	-202724	SYF2	64759	chr15	48849784	-0.777886	FBN1	88261	DUT	226165	chr15	41104516	0.799272	DNAJC17	-4842			chr5	172110702	0.72414	NEURL1B	43933	DUSP1	85996	chr1	234041421	-0.742763	COA6	-466508	SLC35F3	2242	chr4	81207633	0.625447	BMP3	-742986	FGF5	21380
chr1	51442278	-0.82802	C1orf185	-125627	CDKN2C	15862	chr16	79211133	0.628215	MAF	423477			chr15	41104527	0.823422	DNAJC17	-4853			chr7	50850259	0.603564	GRB10	-51709	COBL	532737	chr5	15008799	0.626039	FBXL7	-490006	ANKH	-138412	chr5	1331076	0.815594	TERT	-37414	CLPTM1L	12638
chr1	90664262	0.805363	ZNF326	203589	BARHL2	518531								chr15	41104572	0.852052	DNAJC17	-4898			chr7	50850274	0.668795	GRB10	-51724	COBL	532722	chr5	15008805	0.811013	FBXL7	-490000	ANKH	-138418	chr5	148567409	0.639205	AFAP1L1	-82525	ABLIM3	47732
chr2	206723874	0.858816	NRP2	176651	INO80D	227031								chr15	41104600	0.803574	DNAJC17	-4926			chr7	50850280	0.763931	GRB10	-51730	COBL	532716	chr6	25882414	0.727932	SLC17A3	-9443	SLC17A2	46925	chr7	150822698	0.803103	AGAP3	40369	GBX1	40437
chr2	206723880	0.858816	NRP2	176657	INO80D	227025								chr17	71089274	0.774605	SLC39A11	-448			chr7	50850285	0.696584	GRB10	-51735	COBL	532711	chr6	25882427	0.624982	SLC17A3	-9456	SLC17A2	46912	chr7	150822700	0.80399	AGAP3	40371	GBX1	40435
chr2	206723897	0.858816	NRP2	176674	INO80D	227008								chrX	85175162	0.862665	POF1B	-540415	CHM	127403	chr7	50850299	0.752115	GRB10	-51749	COBL	532697	chr6	28663314	0.793851	SCAND3	-109702	TRIM27	226952	chr8	71368648	0.846367	NCOA2	-54108	TRAM1	150456
chr3	13787881	-0.782477	WNT7A	133736	FBLN2	197251															chr7	50850302	0.810761	GRB10	-51752	COBL	532694	chr6	28663406	0.564146	SCAND3	-109794	TRIM27	226860	chr9	124988795	0.790614	LHX6	829
chr3	189509045	0.80225	TP63	159830	LEPREL1	329672															chr7	50850312	0.716735	GRB10	-51762	COBL	532684	chr6	28663436	0.663163	SCAND3	-109824	TRIM27	226830	chr10	7806075	-0.762384	KIN	22369	ITIH2	62343
chr4	55548848	-0.754101	KIT	24764	KDR	442907															chr7	50850317	0.744847	GRB10	-51767	COBL	532679	chr6	28663447	0.809253	SCAND3	-109835	TRIM27	226819	chr11	71210241	-0.767247	KRTAP5-7	-26572	NADSYN1	47586
chr6	33518020	0.886235	BAK1	29998	ZBTB9	95665															chr7	50850325	0.752868	GRB10	-51775	COBL	532671	chr6	28663467	0.759129	SCAND3	-109855	TRIM27	226799	chr11	71210243	-0.698341	KRTAP5-7	-26570	NADSYN1	47588
chr8	96365815	0.847066	C8orf37	-84387	GDF6	807204															chr7	50850334	0.81814	GRB10	-51784	COBL	532662	chr6	28663492	0.611342	SCAND3	-109880	TRIM27	226774	chr11	71210281	-0.788427	KRTAP5-7	-26532	NADSYN1	47626
chr8	143143005	0.751466	TSNARE1	341537	PTP4A3	740913															chr8	42358334	0.527586	SMIM19	-36464	VDAC3	110413	chr6	28663535	0.744562	SCAND3	-109923	TRIM27	226731	chr11	71210293	-0.787288	KRTAP5-7	-26520	NADSYN1	47638
chr9	136405836	0.784678	ADAMTSL2	8551	FAM163B	45482															chr8	42358650	0.570518	SMIM19	-36148	VDAC3	110729	chr6	28663537	0.795613	SCAND3	-109925	TRIM27	226729	chr11	71210295	-0.787288	KRTAP5-7	-26518	NADSYN1	47640
chr9	136405847	0.784678	ADAMTSL2	8562	FAM163B	45471															chr9	132385916	-0.768704	NTMT1	16253	ASB6	17028	chr6	28663541	0.60679	SCAND3	-109929	TRIM27	226725	chr12	95043070	0.777057	TMCC3	-232
chr9	136405875	0.784678	ADAMTSL2	8590	FAM163B	45443															chr16	57563275	0.67133	DOK4	-44368	CCDC102A	5736	chr6	28663545	0.915875	SCAND3	-109933	TRIM27	226721	chr13	37729703	0.613038	CSNK1A1L	-51400	POSTN	441778
chr9	140168544	0.833375	TOR4A	-3656	NELFB																chr16	87882441	0.740636	KLHDC4	-84386	SLC7A5	19153	chr6	28709851	0.733724	SCAND3	-156239	TRIM27	180415	chr13	37729744	0.69766	CSNK1A1L	-51441	POSTN	441737
chr10	24754430	0.928981	KIAA1217	256338	ARHGAP21	258166															chr17	71010900	-0.590815	SLC39A11	76427	SOX9	895239	chr11	72810724	0.695224	FCHSD2	41082	ATG16L2	286871	chr16	2141559	-0.648724	NTHL1	-45192	PKD1	42840
chr10	24754448	0.928981	KIAA1217	256356	ARHGAP21	258148															chr19	13129338	0.598921	NFIX	24416	LYL1	82843	chr13	112063577	-0.794531	SOX1	-656836	TEX29	92062	chr16	2141569	-0.648724	NTHL1	-45202	PKD1	42830
chr10	24754949	0.841986	KIAA1217	256857	ARHGAP21	257647															chr19	13129356	0.799406	NFIX	24434	LYL1	82825	chr13	112063583	-0.638307	SOX1	-656830	TEX29	92068	chr16	2141571	-0.831909	NTHL1	-45204	PKD1	42828
chr10	69664114	0.615332	SIRT1	19688	HERC4	170925															chr22	30617445	0.803327	LIF	23895	HORMAD2	142782	chr13	112063590	-0.805692	SOX1	-656823	TEX29	92075	chr19	2394779	-0.658599	TMPRSS9	6495	TIMM13	31613
chr10	69664312	0.760344	SIRT1	19886	HERC4	170727															chr22	50171380	0.613437	BRD1	45572			chr13	112063602	-0.656254	SOX1	-656811	TEX29	92087	chr19	2394794	-0.653527	TMPRSS9	6510	TIMM13	31598
chr10	69664316	0.760344	SIRT1	19890	HERC4	170723																						chr13	112063604	-0.805029	SOX1	-656809	TEX29	92089	chr19	7993385	0.777406	CTXN1	-3834
chr10	69664324	0.760344	SIRT1	19898	HERC4	170715																						chr13	112063607	-0.641774	SOX1	-656806	TEX29	92092	chr21	41048721	0.776172	IGSF5	-67113	B3GALT5	121852
chr10	124219484	0.75895	HTRA1	-1556																								chr13	112063613	-0.823417	SOX1	-656800	TEX29	92098	chr21	41048725	0.777057	IGSF5	-67109	B3GALT5	121856
chr11	12746049	-0.518133	TEAD1	-20538	PARVA	347318																						chr13	112063630	-0.815369	SOX1	-656783	TEX29	92115	chr21	45635458	0.75358	ICOSLG	23870	C21orf33	83471
chr11	12746094	-0.752761	TEAD1	-20493	PARVA	347363																						chrY	15676854	0.918564	TMSB4Y	-137093	UTY	-85801	chr21	45635463	0.762441	ICOSLG	23865	C21orf33	83476
chr15	95525564	-0.346908	MCTP2	684070																								chrY	15676857	0.747864	TMSB4Y	-137090	UTY	-85804	chr21	45635467	0.772591	ICOSLG	23861	C21orf33	83480
chr16	23296275	0.871307	SCNN1B	-17315	SCNN1G	102240																						chrY	15676869	0.922261	TMSB4Y	-137078	UTY	-85816
chr16	84479557	0.972036	TLDC1	58806	ATP2C2	77425
chr17	11847643	0.680164	ZNF18	53045	DNAH9	345896
chr18	61143850	0.762043	SERPINB5	-143
chr18	61143903	0.762043	SERPINB5	-90
chr19	16426978	-0.776959	KLF2	-8649	AP1M1	118234
chr19	32897522	0.766854	DPY19L3	492
chr19	32897540	0.766854	DPY19L3	510
chr20	39373248	-0.844413	TOP1	-284209	MAFB	-55369
chrX	5845910	0.820834	NLGN4X	300993
